# Supplementary material for: A European pattern climatology 1766–2000
Source: Springer Nature journal article supplement (doi:10.1007/s00382-007-0257-6), 2007-05-21
Supplement: 382_2007_257_MOESM2_ESM.pdf [file 382_2007_257_MOESM2_ESM.pdf]

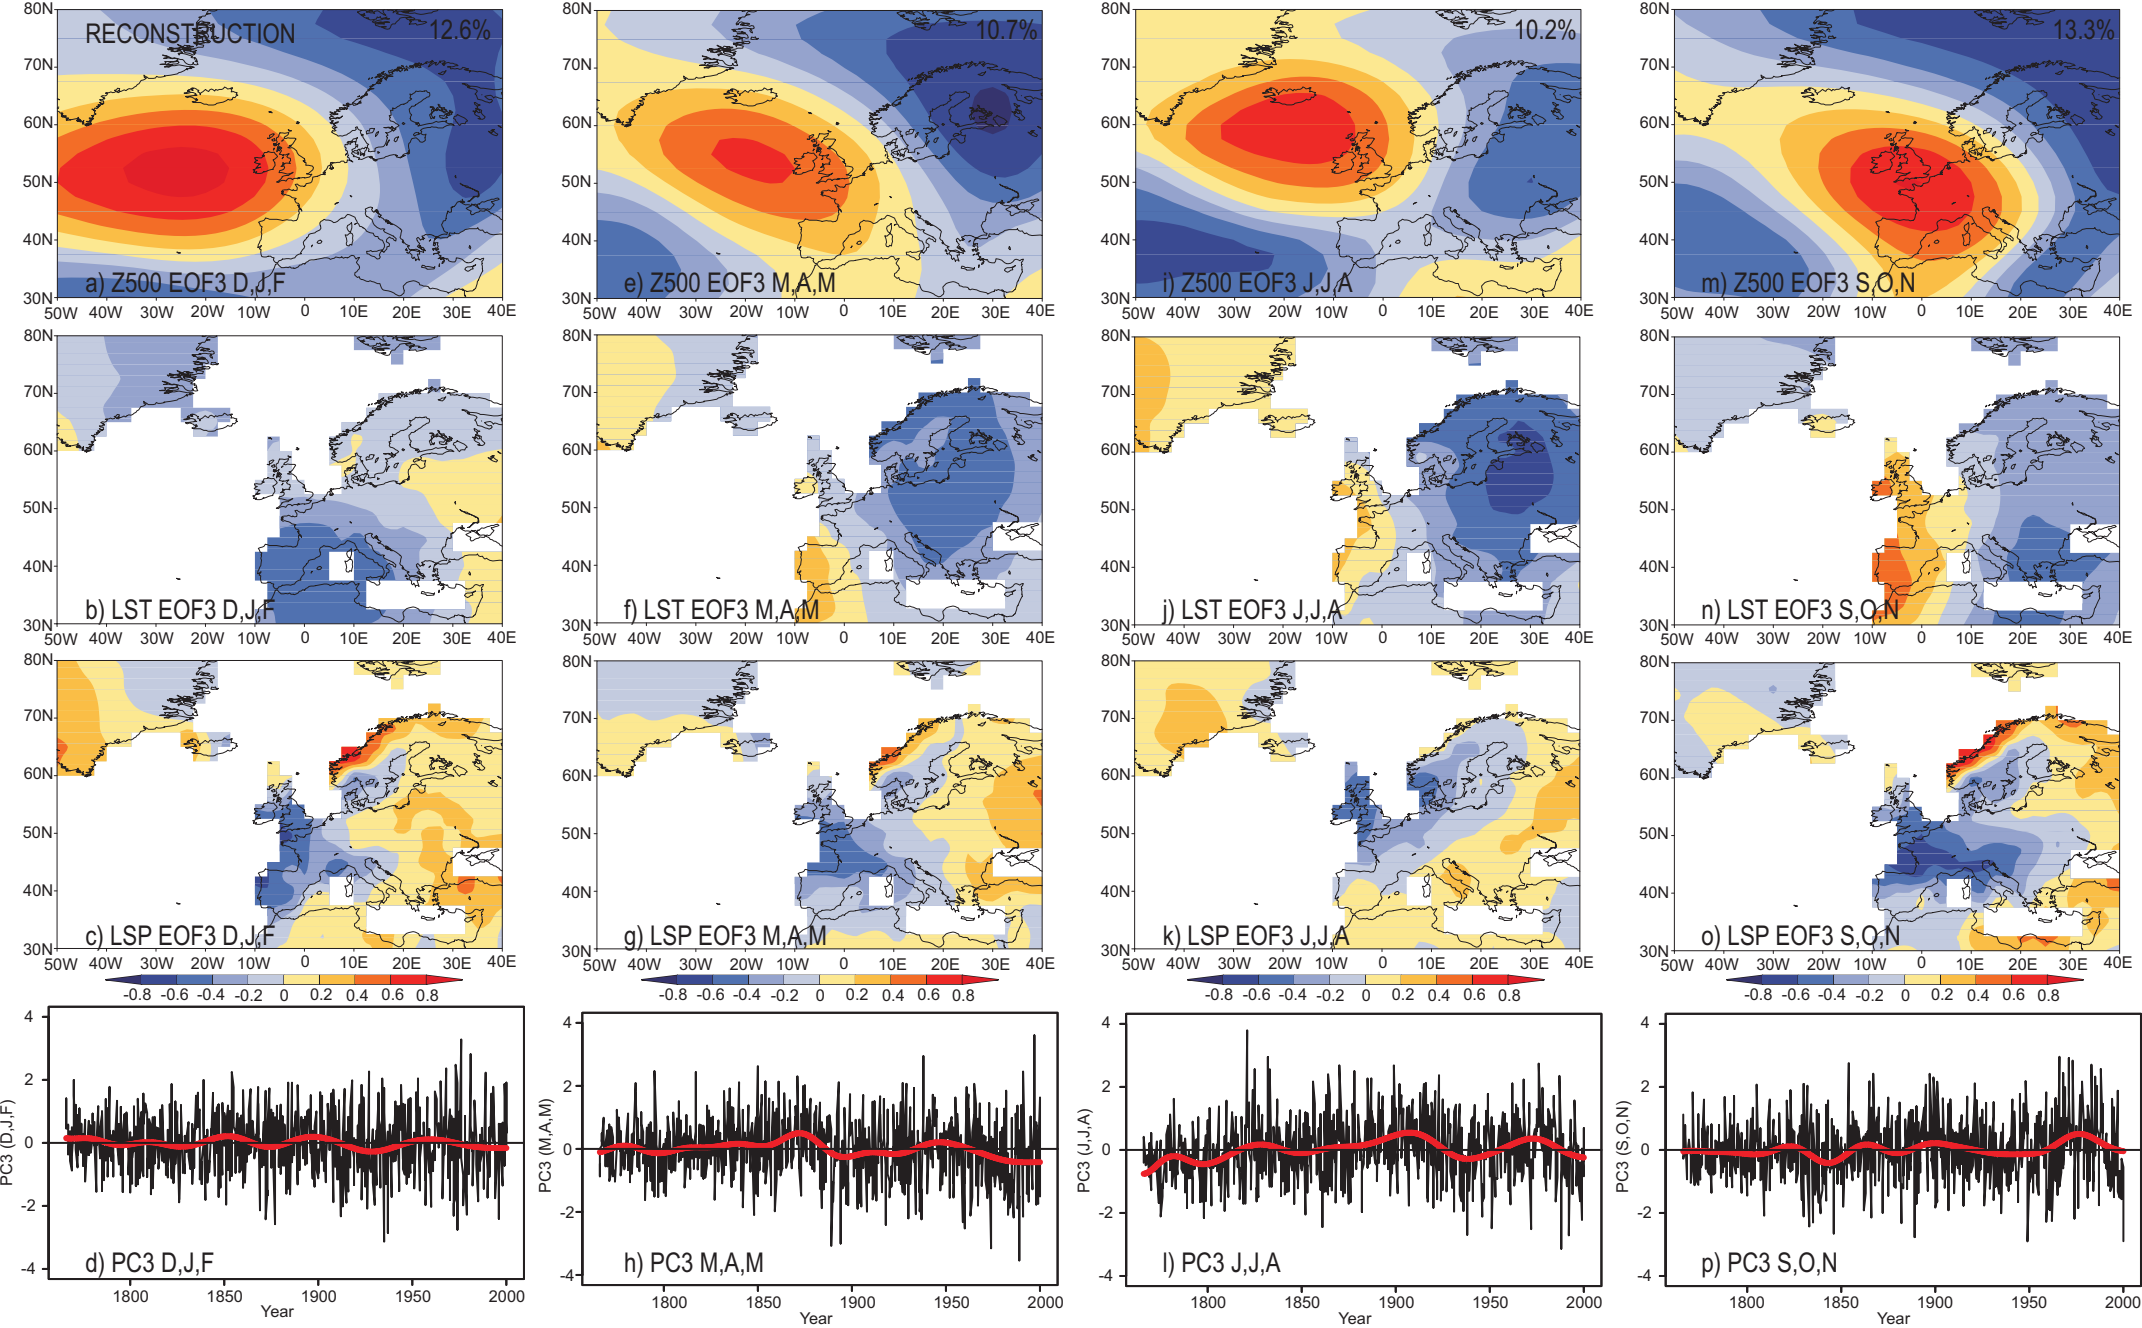

Figure B a-c): Third Empirical Orthogonal Function (EOF3) winter (D,J,F) pattern of the 500 hPa geopotential height (Z500, a), the land surface temperatures (LST, b), and land surface precipitation (LSP, c) obtained from the described combined linear EOF analysis 1766-2000. Values are correlations. d) The corresponding normalised Principal Components (PC) 1766-2000 of the combined EOF1. Indicated by the red curve is the 31-year smoothing (Mann 2004). e-p) The same as for a-d) but for spring (e-h, M,A,M), summer (i-l, J,J,A), and autumn (m-p, S,O,N) respectively. In the top right corners of Figures a, e, i, and m the explained variance of the respective EOF is shown.
