# Supplementary material for: A European pattern climatology 1766–2000
Source: Springer Nature journal article supplement (doi:10.1007/s00382-007-0257-6), 2007-05-21
Supplement: 382_2007_257_MOESM3_ESM.pdf [file 382_2007_257_MOESM3_ESM.pdf]

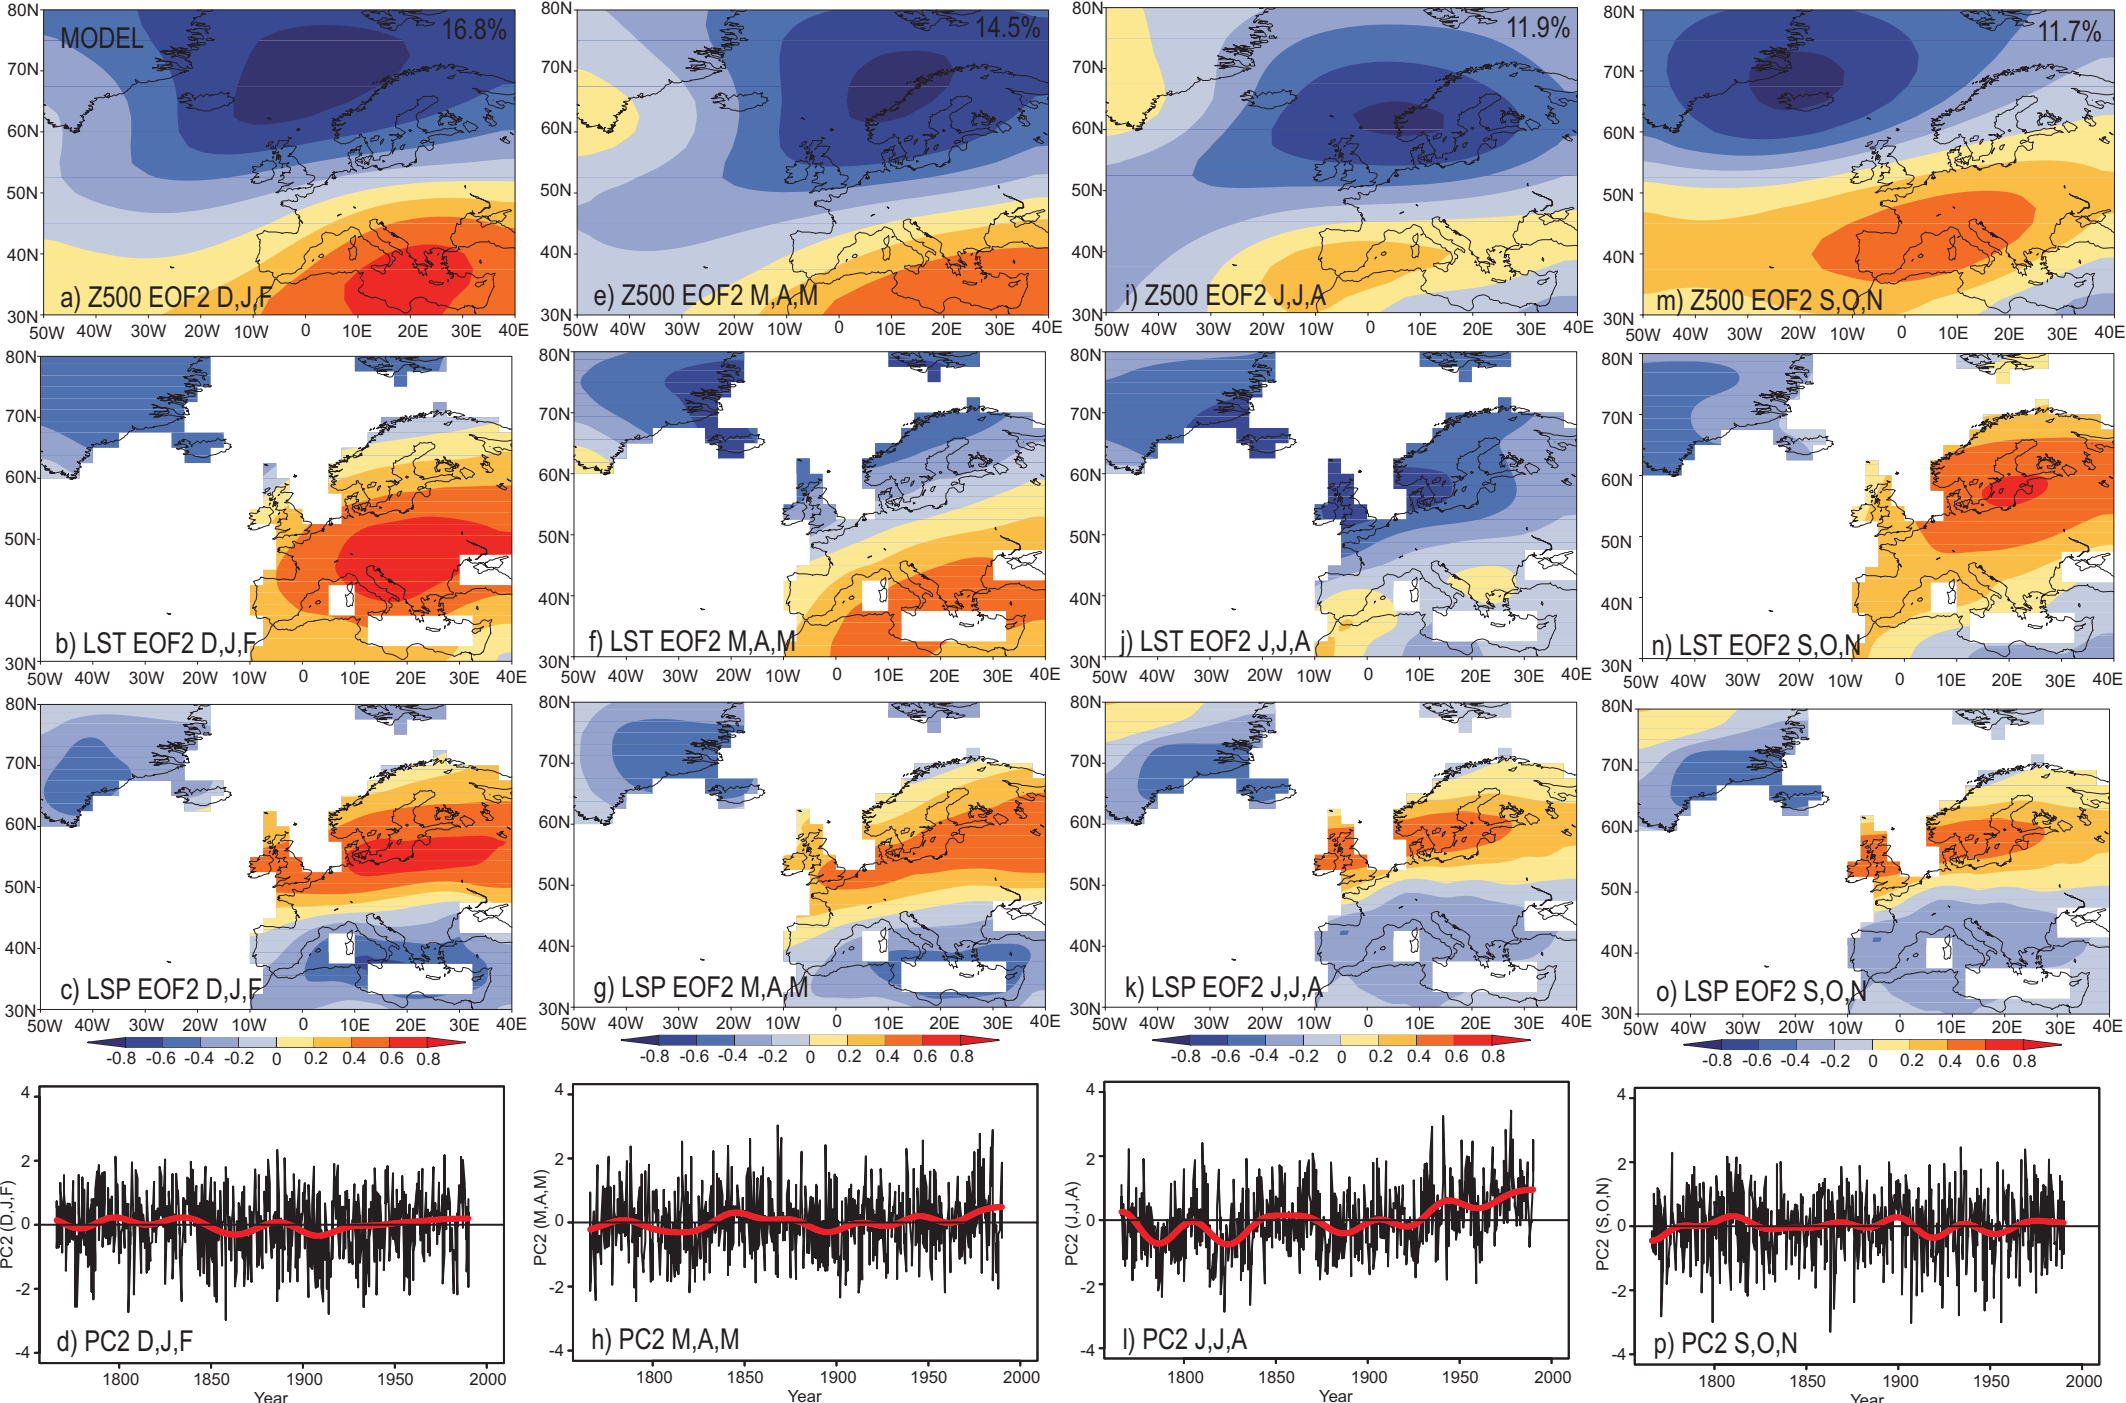

Figure C a-c): Second Empirical Orthogonal Function (EOF2) winter (D, J, F) pattern of the *modelled* 500 hPa geopotential height (Z500, a), the land surface temperatures (LST, b), and land surface precipitation (LSP, c) obtained from the described combined linear EOF analysis 1766-1990. Values are correlations. d) The corresponding normalised Principal Components (PC) 1766-1990 of the combined EOF1. Indicated by the red curve is the 31-year smoothing (Mann 2004). e-p) The same as for a-d) but for spring (e-h, M, A, M), summer (i-l, J, J, A), and autumn (m-p, S, O, N) respectively. In the top right corners of Figures a, e, i, and m the explained variance of the respective EOF is shown.
